# Supplementary material for: Evaluating two soil carbon models within a global land surface model using surface and spaceborne observations of atmospheric CO 2 mole fractions
Source: Copernicus journal article supplement (doi:10.5194/bg-2020-7), 2020-02-10
Supplement: Supplementary file 1 [file bg-2020-7-supplement.pdf]

# Supplementary material for: Evaluating two soil carbon models within a global land surface model using surface and spaceborne observations of atmospheric CO<sub>2</sub> mole fractions

Tea Thum<sup>1</sup>, Julia E. S. M. Nabel<sup>2</sup>, Aki Tsuruta<sup>3</sup>, Tuula Aalto<sup>3</sup>, Edward J. Dlugokencky<sup>4</sup>, Jari Liski<sup>3</sup>, Ingrid T. Luijkx<sup>5</sup>, Tiina Markkanen<sup>3</sup>, Julia Pongratz<sup>6</sup>, Yukio Yoshida<sup>7</sup>, and Sönke Zaehle<sup>1</sup>

<sup>1</sup>Max Planck Institute for Biogeochemistry, Jena, Germany

<sup>2</sup>Max Planck Institute for Meteorology, Hamburg, Germany

<sup>3</sup>The Finnish Meteorological Institute, Helsinki, Finland

<sup>4</sup>NOAA ESRL Global Monitoring Division, Boulder CO, United States

<sup>5</sup>Meteorology and Air Quality Group, Wageningen University and Research, Wageningen, The Netherlands

<sup>6</sup>Department of Geography, Ludwig-Maximilians-Universität, Munich, Germany

<sup>7</sup>Center for Global Environmental Research, National Institute for Environmental Studies, Tsukuba, Japan

**Correspondence:** Tea Thum (tthum@bgc-jena.mpg.de)

## S1 Details on JSBACH simulations

Simulations were conducted on Mistral (the High Performance Computing system of the German Climate Computing Center (DKRZ)), using revision 8522 of *cosmos – landveg\_rc – echam6.3\_FOM – alloc*, a svn branch of *cosmos-landveg*, the former JSBACH development branch of the department "The Land in the Earth System" of the Max Planck Institute for  
5 Meteorology.

For each of the two transient simulations described in the main text, an own spin-up has been conducted. Both spin-ups follow the same set-up, cycling detrended 1901-1920 forcing based on CRUNCEP v6 with a constant 1860 CO<sub>2</sub> concentration (286.42 ppm). The spin-ups used a static land-use map for 1860, based on 1860 crop and pasture cover from the LUHv1 dataset (Hurt et al., 2011) and a potential vegetation map extrapolated from remote sensing (Pongratz et al., 2008).

## 10 **References**

- Hurtt, G. C., Chini, L. P., Frohking, S., Betts, R. A., Feddema, J., Fischer, G., Fisk, J. P., Hibbard, K., Houghton, R. A., Janetos, A., Jones, C. D., Kindermann, G., Kinoshita, T., Klein Goldewijk, K., Riahi, K., Shevliakova, E., Smith, S., Stehfest, E., Thomson, A., Thornton, P., van Vuuren, D. P., and Wang, Y. P.: Harmonization of land-use scenarios for the period 1500–2100: 600 years of global gridded annual land-use transitions, wood harvest, and resulting secondary lands, *Climatic Change*, 109, 117, <https://doi.org/10.1007/s10584-011-0153-2>,  
15 <https://doi.org/10.1007/s10584-011-0153-2>, 2011.
- Pongratz, J., Reick, C., Raddatz, T., and Claussen, M.: A reconstruction of global agricultural areas and land cover for the last millennium, *Global Biogeochemical Cycles*, 22, <https://doi.org/10.1029/2007GB003153>, <https://agupubs.onlinelibrary.wiley.com/doi/abs/10.1029/2007GB003153>, 2008.

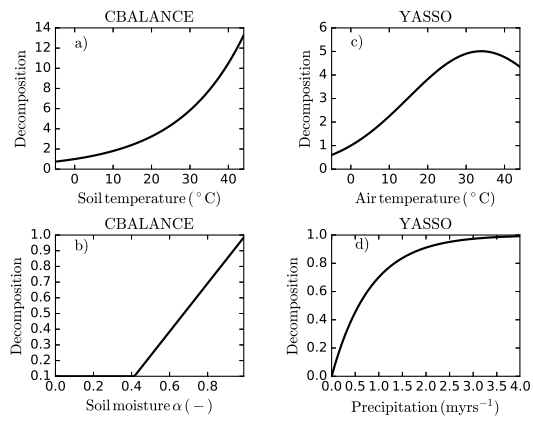

**Figure S1.** The environmental response functions of CBALANCE (CBA) and YASSO (YAS) models. The dependency on soil temperature by CBA (a), on soil moisture by CBA (b), on air temperature by YAS (c) and on precipitation by YAS (d).

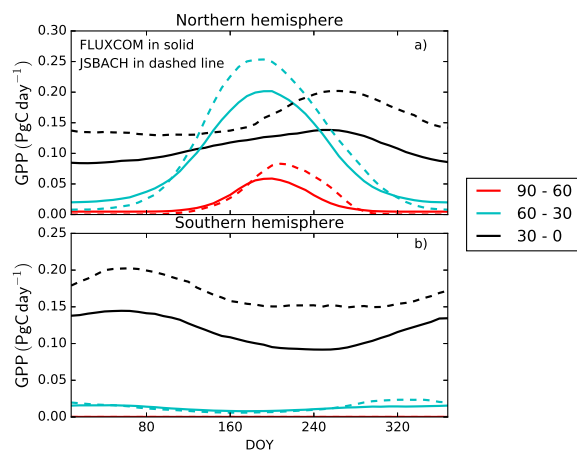

**Figure S2.** The seasonal cycle of GPP, which is independent of the soil module, for different latitudinal zones in northern (a) and southern (b) hemispheres. The FLUXCOM is in solid line, the JSBACH result in dashed line.

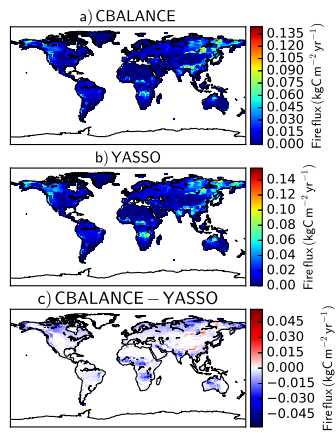

**Figure S3.** The global map of averaged annual fire fluxes by CBALANCE (a), YASSO (b) and their difference (c).

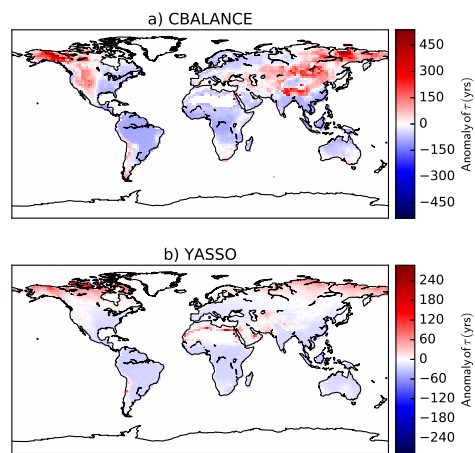

**Figure S4.** The turnover time ( $\tau$ ) anomalies for CBALANCE (a) and YASSO (b). The average turnover time that was subtracted was 104 years for CBALANCE and 31 years for YASSO.

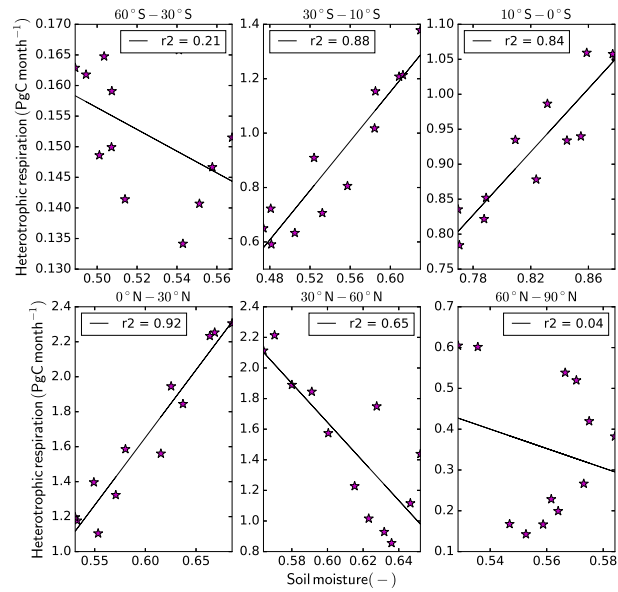

**Figure S5.** The monthly heterotrophic respiration from the CBALANCE model as a function of soil moisture ( $\alpha$ ) for different latitudinal regions.

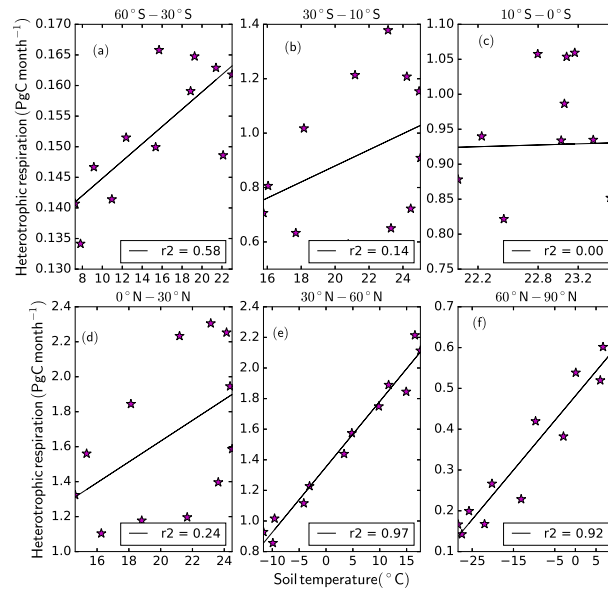

**Figure S6.** The monthly heterotrophic respiration from the CBALANCE model as a function of soil temperature for different latitudinal regions.



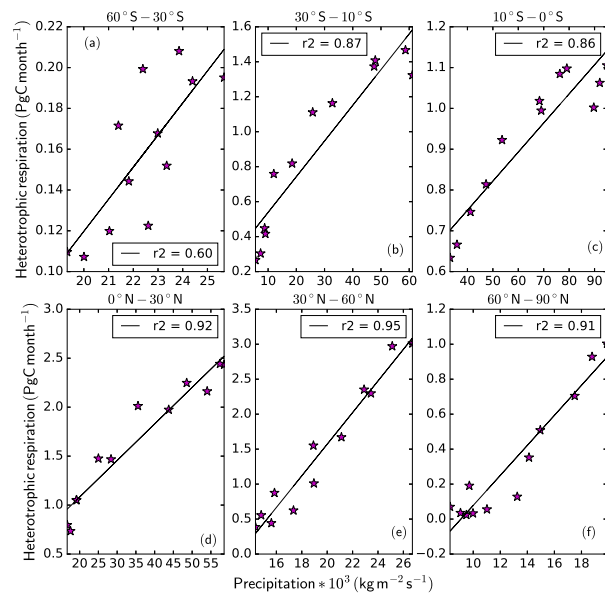

**Figure S7.** The monthly heterotrophic respiration from the YASSO model as a function of precipitation for different latitudinal regions.

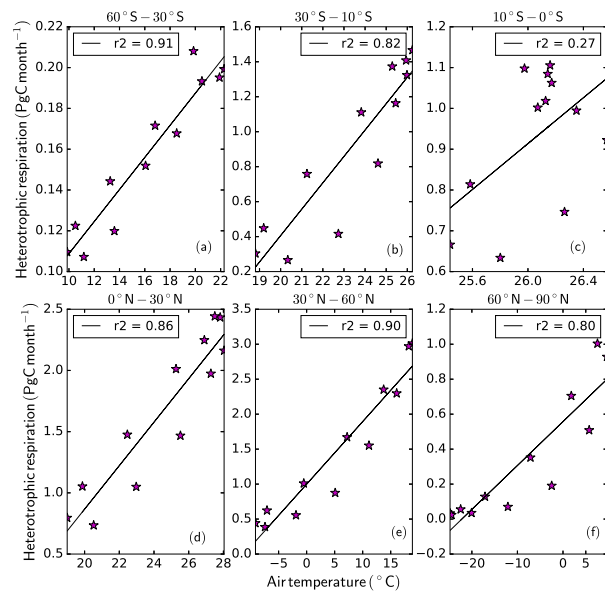

**Figure S8.** The monthly heterotrophic respiration from the YASSO model as a function of air temperature for different latitudinal regions.

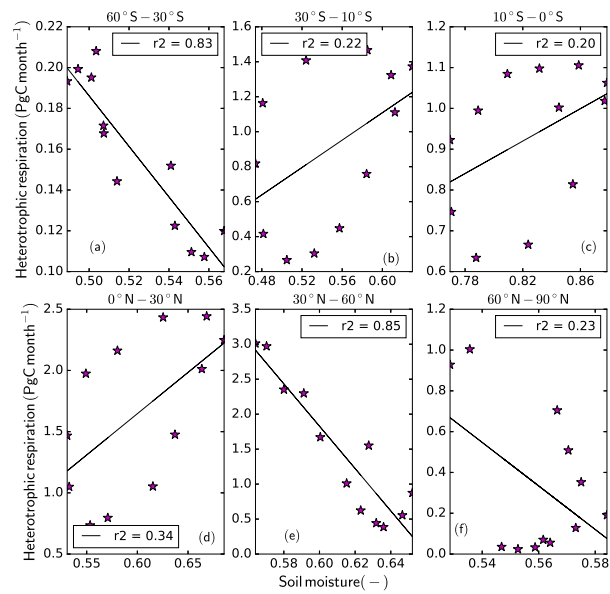

**Figure S9.** The monthly heterotrophic respiration from the YASSO model as a function of soil moisture ( $\alpha$ ) for different latitudinal regions.

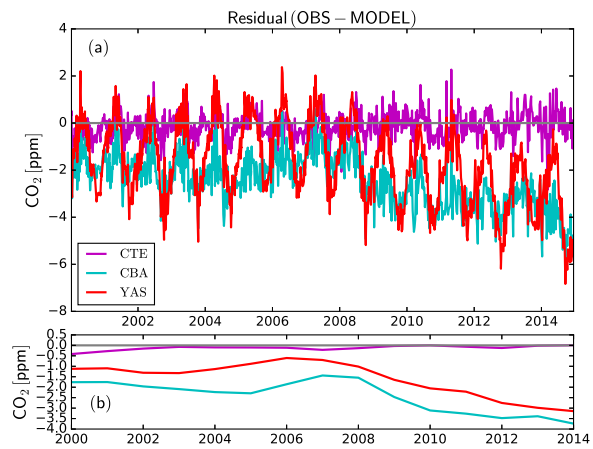

**Figure S10.** The residual between the observed and modelled CO<sub>2</sub> molar fraction (in ppm) at Mauna Loa between 2000 and 2014. The residual between observations and CarbonTracker Europe 2016 (2016) in magenta, between observations and CBALANCE (CBA) in cyan and between observations and YASSO (YAS) in red. The values are given for the whole flask observational time series (a) and yearly averages (b).

**Table S1.** The annual fossil fuel and ocean fluxes from CarbonTracker Europe (CTE2016).

| Year | Fossil fuel (PgCyr <sup>-1</sup> ) | Ocean (PgCyr <sup>-1</sup> ) |
|------|------------------------------------|------------------------------|
| 2001 | 6.97                               | -1.60                        |
| 2002 | 7.07                               | -1.31                        |
| 2003 | 7.47                               | -2.16                        |
| 2004 | 7.87                               | -2.33                        |
| 2005 | 8.22                               | -2.27                        |
| 2006 | 8.52                               | -2.72                        |
| 2007 | 8.77                               | -2.46                        |
| 2008 | 8.98                               | -2.49                        |
| 2009 | 8.86                               | -2.04                        |
| 2010 | 9.20                               | -2.70                        |
| 2011 | 9.53                               | -2.49                        |
| 2012 | 9.71                               | -2.73                        |
| 2013 | 9.81                               | -2.61                        |
| 2014 | 9.88                               | -2.64                        |

**Table S2.** The seasonal cycle amplitudes (SCAs), carbon uptake periods (CUPs) and Pearson correlation coefficients for the four Global Atmospheric Watch (GAW) sites.

| Variable (Unit) | Alert | Pallas | Niwot Ridge | Mauna Loa |
|-----------------|-------|--------|-------------|-----------|
| SCA (ppm)       |       |        |             |           |
| Obs.            | 16.2  | 19.3   | 8.7         | 7.1       |
| CTE             | 16.1  | 17.7   | 8.1         | 6.6       |
| CBA             | 23.8  | 27.8   | 8.4         | 6.2       |
| YAS             | 15.5  | 19.2   | 3.7         | 3.6       |
| CUP (days)      |       |        |             |           |
| Obs.            | 142   | 151    | 180         | 161       |
| CTE             | 144   | 150    | 177         | 162       |
| CBA             | 141   | 150    | 179         | 157       |
| YAS             | 140   | 155    | 186         | 145       |
| $r^2$ (-)       |       |        |             |           |
| CTE             | 0.99  | 0.99   | 0.95        | 0.99      |
| CBA             | 0.99  | 0.99   | 0.91        | 0.99      |
| YAS             | 0.81  | 0.83   | 0.80        | 0.94      |

**Table S3.** The SCAs and Pearson correlation coefficients for the TransCom (TC) regions for the GOSAT observations, the CBALANCE (CBA) model and the YASSO (YAS) model.

| Variable (unit) | GOSAT | CBA  | YAS  |
|-----------------|-------|------|------|
| SCA (ppm)       |       |      |      |
| TC=1            | 11.6  | 14.5 | 10.4 |
| TC=2            | 6.4   | 5.8  | 2.8  |
| TC=3            | 4.6   | 5.0  | 5.4  |
| TC=4            | 1.9   | 2.8  | 3.1  |
| TC=5            | 5.4   | 5.2  | 2.9  |
| TC=6            | 2.8   | 2.5  | 2.3  |
| TC=7            | 11.2  | 12.4 | 7.4  |
| TC=8            | 6.8   | 5.0  | 2.2  |
| TC=9            | 5.5   | 3.9  | 3.9  |
| TC=10           | 1.4   | 1.5  | 1.5  |
| TC=11           | 4.1   | 4.5  | 3.5  |
| $r^2$ (-)       |       |      |      |
| TC=1            | -     | 0.94 | 0.75 |
| TC=2            | -     | 0.90 | 0.83 |
| TC=3            | -     | 0.81 | 0.49 |
| TC=4            | -     | 0.34 | 0.00 |
| TC=5            | -     | 0.51 | 0.05 |
| TC=6            | -     | 0.83 | 0.80 |
| TC=7            | -     | 0.89 | 0.80 |
| TC=8            | -     | 0.86 | 0.80 |
| TC=9            | -     | 0.72 | 0.66 |
| TC=10           | -     | 0.88 | 0.86 |
| TC=11           | -     | 0.96 | 0.96 |
